# Supplementary material
Source: PubMed Central journal article supplement (PMC1852213)

**A**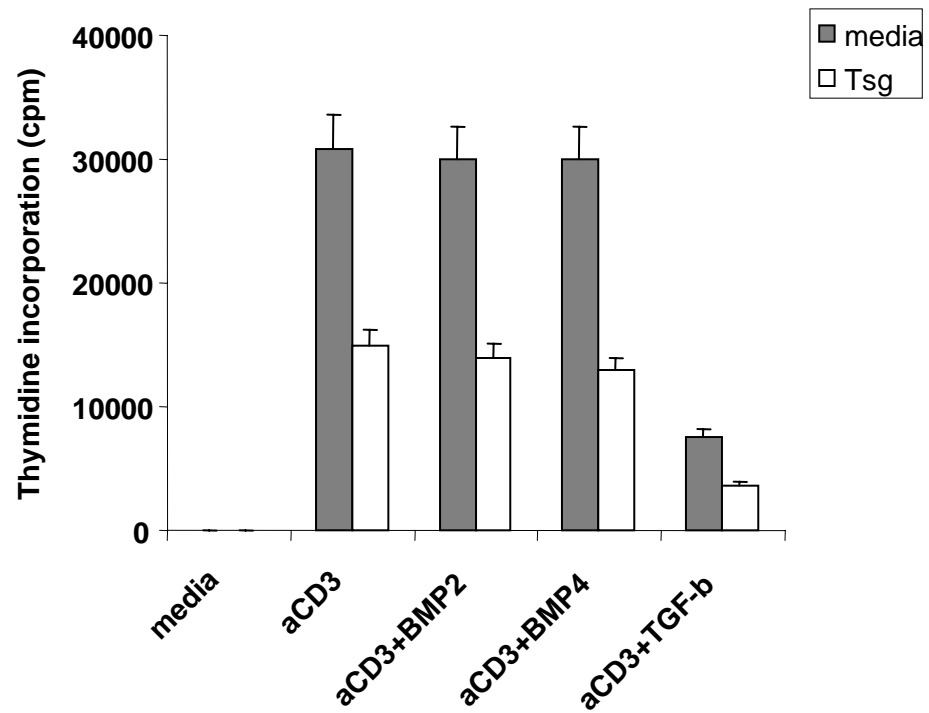**B**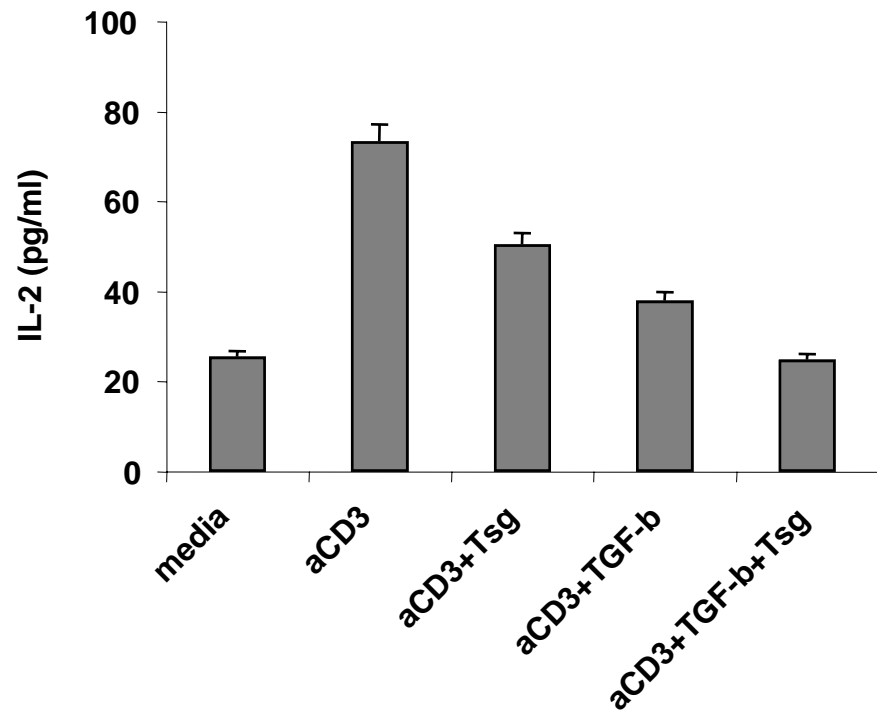

Supplement: blood_blood-2006-03-006510_1.pdf [file blood_blood-2006-03-006510_1.pdf]

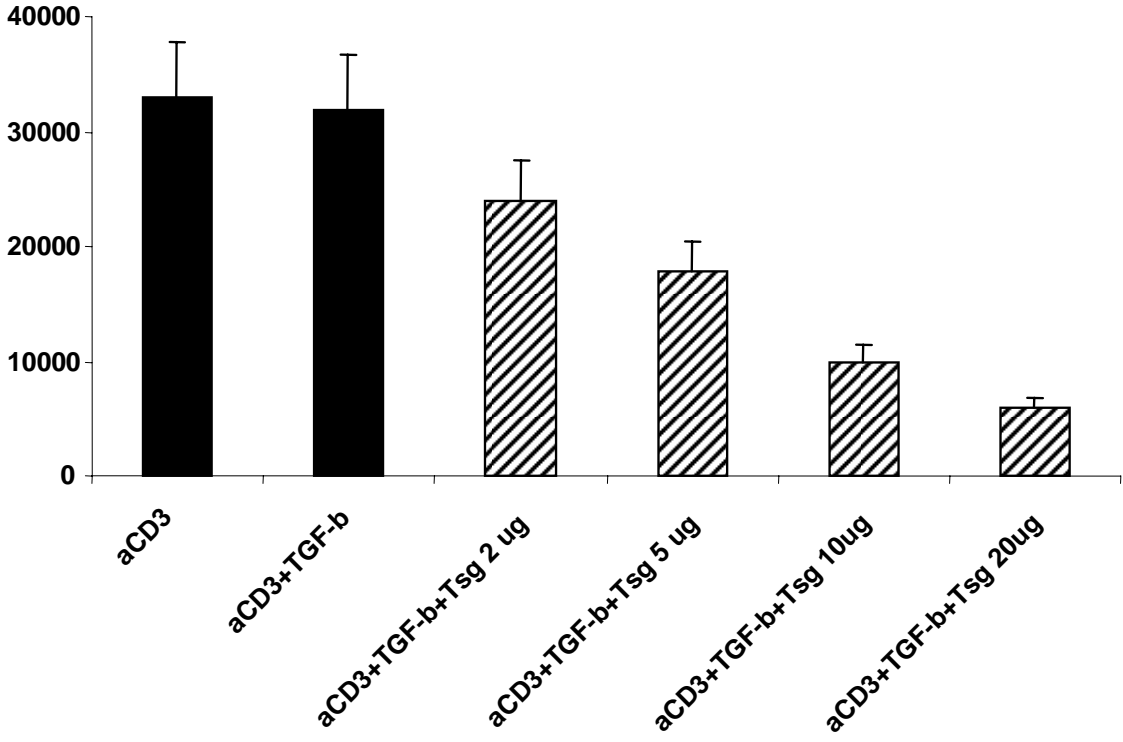

Supplement: blood_blood-2006-03-006510_2.pdf [file blood_blood-2006-03-006510_2.pdf]

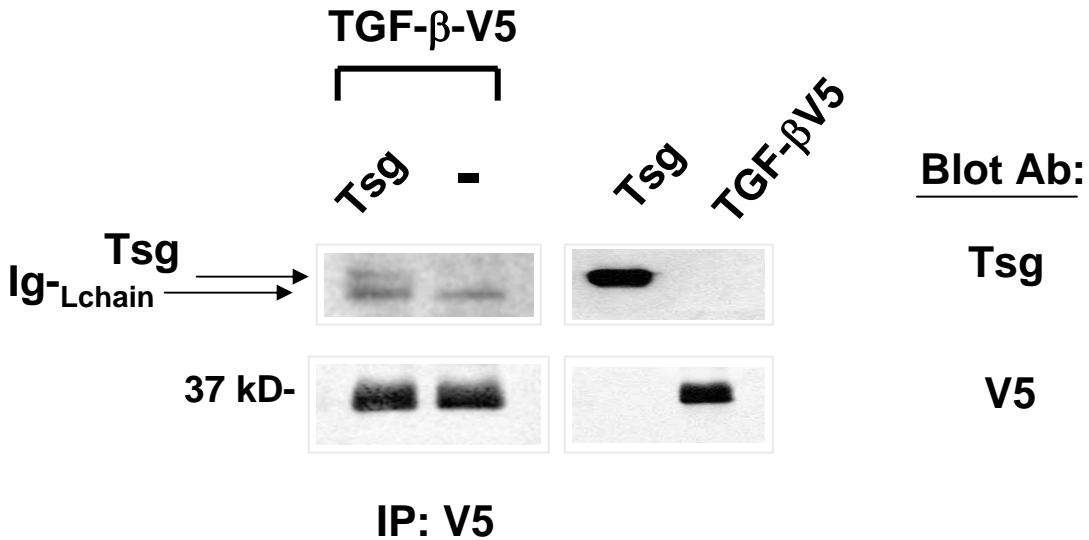

Supplement: blood_blood-2006-03-006510_3.pdf [file blood_blood-2006-03-006510_3.pdf]
